# Supplementary material for: The Relative Ineffectiveness of Criminal Network Disruption
Source: PubMed Central journal article supplement — Sci Rep. 2014 Feb 28;4:4238. doi: 10.1038/srep04238 (PMC3937802; doi:10.1038/srep04238), 2014-02-28
Supplement: srep04238-s1.pdf [file srep04238-s1.pdf]

## The relative ineffectiveness of Criminal Network Disruption: Properties of hard- and soft- datasets

Paul A.C. Duijn<sup>1,2</sup>, Victor Kashirin<sup>2,3</sup> and Peter M.A. Sloot<sup>3,4,5,6</sup>

The data collection process is described in section 5.1 of the main manuscript; here we present additional information on some of the characteristics of the datasets.

### *Featured properties of the datasets*

We studied a cumulative dataset of persons involved in criminal activity built with arrest registrations and informants data that contains 85192 records. Not all criminals participated in organized crime; some of them are not a part of a criminal network. In Figure S-1 we depict the overlap between hard- and soft- data connections within the network.

In Table S-1 the distribution of ages between genders and a summary of gender populations is listed. Not all records in the database have information on gender and age of criminals, but most of them have.

**Table S-1. Gender and age distribution in cumulative hard and soft records database**

| Age interval/<br>/Gender | 10-19 | 20-29 | 30-39 | 40-49 | 50-59 | 60-69 | 70-79 | 80-89 | 90-99 | 100-109 | Total Amount |
|--------------------------|-------|-------|-------|-------|-------|-------|-------|-------|-------|---------|--------------|
| <b>Male</b>              | 5185  | 19810 | 14708 | 13455 | 8432  | 4029  | 1203  | 301   | 53    | 4       | <b>67180</b> |
| <b>Female</b>            | 1485  | 4660  | 3139  | 3046  | 2069  | 944   | 343   | 96    | 34    | 0       | <b>15816</b> |

**Table S-2. Distribution of person registrations by country of origin**

| Country of origin | Amount of registrants | Country of origin | Amount of registrants | Country of origin | Amount of registrants |
|-------------------|-----------------------|-------------------|-----------------------|-------------------|-----------------------|
| Nederland         | 45253                 | Tunisia           | 157                   | Canada            | 37                    |
| Suriname          | 4405                  | China             | 141                   | Syria             | 37                    |
| Turkey            | 2878                  | Romania           | 127                   | Germany           | 36                    |
| Morocco           | 2846                  | Iraq              | 113                   | South Africa      | 33                    |
| Netherlands       | 2384                  | USA               | 105                   | Ukraine           | 33                    |
| Antilles          |                       |                   |                       |                   |                       |
| Poland            | 2240                  | Panama            | 99                    | Hong Kong         | 32                    |
| Bulgaria          | 791                   | Algeria           | 96                    | Italy             | 32                    |
| Sudan             | 446                   | Yugoslavia        | 81                    | Angola            | 30                    |
| Namibia           | 444                   | Indonesia         | 77                    | Lebanon           | 30                    |
| Iran              | 425                   | Liberia           | 70                    | USSR              | 27                    |
| Afghanistan       | 391                   | Russia            | 61                    | Australia         | 25                    |
| Great Britain     | 290                   | Kuwait            | 52                    | East Germany      | 23                    |
|                   |                       | Turks and         |                       |                   |                       |
| Colombia          | 252                   | Caicos Islands    | 51                    | Congo             | 22                    |

<sup>1</sup> Department of Research and Analysis, Unit The Hague, Dutch Police

<sup>2</sup> P.A.C. Duijn and V. Kashirin share first authorship

<sup>3</sup> National Research University ITMO, Saint Petersburg, Russian Federation.

<sup>4</sup> The University of Amsterdam, Faculty of Science, The Netherlands

<sup>5</sup> Complexity Institute, Nanyang Technological University, Singapore

<sup>6</sup> Corresponding Author: E-mail: P.M.A.Sloot@uva.nl

|                    |     |            |    |         |    |
|--------------------|-----|------------|----|---------|----|
| Dominican Republic | 241 | Egypt      | 50 | Rwanda  | 22 |
| Ethiopia           | 222 | Cape Verde | 45 | Hungary | 21 |
| India              | 207 | Nigeria    | 44 |         |    |
| Ghana              | 204 | Aruba      | 43 |         |    |
| Pakistan           | 186 | Belgium    | 40 |         |    |
| Somalia            | 165 | Mongolia   | 40 |         |    |
| Lithuania          | 160 | Thailand   | 38 |         |    |

The data in Table S-2 describes the distribution of person records by the countries of origin. The triad that gives the biggest contribution to the cannabis criminal situation is The Netherlands, Suriname and Turkey.

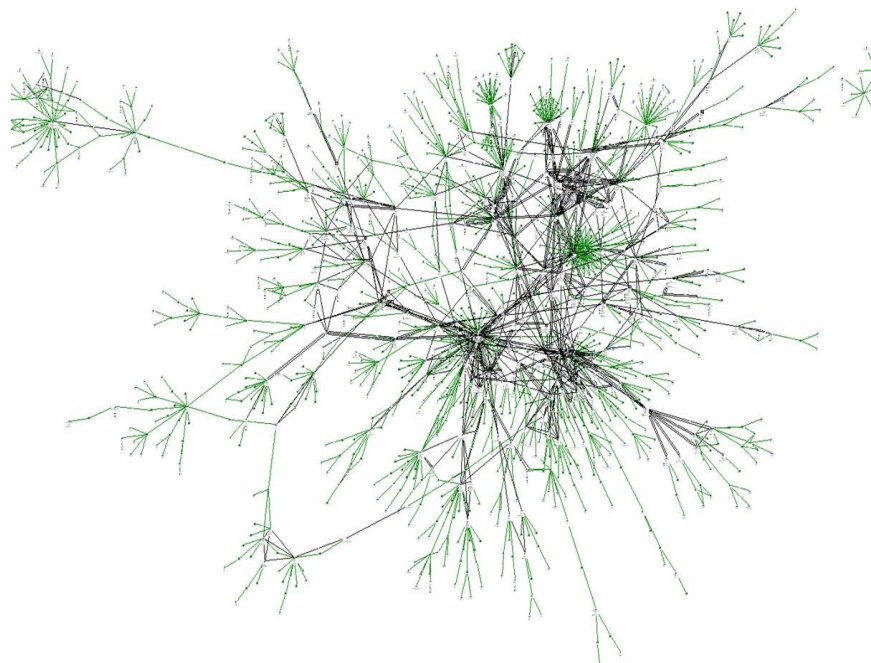

**Fig. S-1** Example of the overlap between hard and soft data connections within the network. The black lines correspond with soft data connections. The green lines correspond with hard data connections.

### **Comparison of linking preference between roles within the value chain and the full network**

The difference between practical and theoretical production chain setups is considered in Table S-3. Real data setup was collected by considering all the links between actors involved in cannabis production, and theoretical setup was built by filtering all the links which do not fit the theoretical setup of a cannabis production value chain as shown in Fig.3 of the main text. The column *Role of node* indicates that we consider all the actors with this role, and column *Number of links with adjacent nodes of particular role* indicates how many links within a particular setup (real data or theoretical) there were between actors with roles we consider and actors with roles listed in these columns. Bold fonts distinguish roles, which are present in a theoretical setup as adjacent to this role. Grey background color shows parts that match both setups.

**Table S-3. Appearance of links between actors of specific roles within the full network and theoretical VC**

| Role of node                         | Number of links with adjacent nodes of particular role |                                      |                                      |                                      |
|--------------------------------------|--------------------------------------------------------|--------------------------------------|--------------------------------------|--------------------------------------|
|                                      | Real data setup                                        | Theoretical setup                    |                                      |                                      |
| International trade                  | <b>Coordinator</b>                                     | 83                                   | <b>Coordinator</b>                   | 83                                   |
|                                      | <b>International trade</b>                             | 61                                   | <b>International trade</b>           | 61                                   |
|                                      | <b>Transporting</b>                                    | 51                                   | <b>Transporting</b>                  | 51                                   |
|                                      | <b>Selling to coffeeshops</b>                          | 36                                   | <b>Selling to coffeeshops</b>        | 36                                   |
|                                      | Financing                                              | 23                                   | <b>Growshop owner</b>                | 8                                    |
|                                      | Taking care of plants                                  | 17                                   |                                      |                                      |
|                                      | Adding weight to the toppings                          | 14                                   |                                      |                                      |
|                                      | Supply of cuttings for plants                          | 12                                   |                                      |                                      |
|                                      | Arranging location for plantation                      | 8                                    |                                      |                                      |
|                                      | <b>Growshop owner</b>                                  | 8                                    |                                      |                                      |
| Financing                            | <b>Coordinator</b>                                     | 63                                   | <b>Coordinator</b>                   | 63                                   |
|                                      | <b>Taking care of plants</b>                           | 26                                   | <b>Financing</b>                     | 25                                   |
|                                      | Financing                                              | 25                                   |                                      |                                      |
|                                      | International trade                                    | 23                                   |                                      |                                      |
| Transporting                         | <b>International trade</b>                             | 51                                   | <b>International trade</b>           | <b>51</b>                            |
|                                      | <b>Coordinator</b>                                     | 34                                   | <b>Coordinator</b>                   | <b>34</b>                            |
|                                      | <b>Transporting</b>                                    | 17                                   | <b>Transporting</b>                  | <b>17</b>                            |
|                                      | Financing                                              | 12                                   | <b>Selling to coffeeshops</b>        | <b>12</b>                            |
|                                      | <b>Selling to coffeeshops</b>                          | 12                                   | <b>Growshop owner</b>                | <b>4</b>                             |
|                                      | Taking care of plants                                  | 7                                    |                                      |                                      |
|                                      | Arranging location for plantation                      | 6                                    |                                      |                                      |
|                                      | Arranging fake owners of property                      | 4                                    |                                      |                                      |
|                                      | <b>Growshop owner</b>                                  | 4                                    |                                      |                                      |
|                                      | Growshop owner                                         | <b>Supply of cuttings for plants</b> | 18                                   | <b>Supply of cuttings for plants</b> |
| <b>Growshop owner</b>                |                                                        | 11                                   | <b>Growshop owner</b>                | <b>11</b>                            |
| <b>Supply of growth necessities</b>  |                                                        | 11                                   | <b>Supply of growth necessities</b>  | <b>11</b>                            |
| <b>International trade</b>           |                                                        | 8                                    | <b>International trade</b>           | <b>8</b>                             |
| Financing                            |                                                        | 7                                    | <b>Selling to coffeeshops</b>        | <b>5</b>                             |
| Taking care of plants                |                                                        | 7                                    | <b>Transporting</b>                  | <b>4</b>                             |
| <b>Selling to coffeeshops</b>        |                                                        | 5                                    | <b>Adding weight to the toppings</b> | <b>4</b>                             |
| <b>Adding weight to the toppings</b> |                                                        | 4                                    | <b>Arranging storage</b>             | <b>2</b>                             |
| <b>Transporting</b>                  |                                                        | 4                                    | <b>Drying toppings</b>               | <b>1</b>                             |
| Coordinator                          |                                                        | 3                                    |                                      |                                      |
| <b>Arranging storage</b>             |                                                        | 2                                    |                                      |                                      |
| Arranging location for plantation    |                                                        | 2                                    |                                      |                                      |
| <b>Drying toppings</b>               |                                                        | 1                                    |                                      |                                      |

|                                   |                                          |    |                                          |    |
|-----------------------------------|------------------------------------------|----|------------------------------------------|----|
| Supply of growth necessities      | <b>Coordinator</b>                       | 13 | <b>Coordinator</b>                       | 13 |
|                                   | <b>Growshop owner</b>                    | 11 | <b>Growshop owner</b>                    | 11 |
|                                   | Financing                                | 9  | <b>Supply of growth necessities</b>      | 6  |
|                                   | <b>Supply of growth necessities</b>      | 6  | <b>Building a plantation</b>             | 3  |
|                                   | Arranging fake owners of property        | 3  | <b>Diverting electricity</b>             | 1  |
|                                   | International trade                      | 3  |                                          |    |
|                                   | Transporting                             | 3  |                                          |    |
|                                   | Taking care of plants                    | 3  |                                          |    |
|                                   | <b>Building a plantation</b>             | 3  |                                          |    |
|                                   | Arranging location for plantation        | 2  |                                          |    |
|                                   | Selling to coffeeshops                   | 2  |                                          |    |
|                                   | Protection of plantation                 | 2  |                                          |    |
|                                   | <b>Diverting electricity</b>             | 1  |                                          |    |
| Selling to coffeeshops            | <b>Coordinator</b>                       | 43 | <b>Coordinator</b>                       | 43 |
|                                   | <b>International trade</b>               | 36 | <b>International trade</b>               | 36 |
|                                   | <b>Selling to coffeeshops</b>            | 24 | <b>Selling to coffeeshops</b>            | 24 |
|                                   | Taking care of plants                    | 14 | <b>Transporting</b>                      | 12 |
|                                   | Supply of cuttings for plants            | 13 | <b>Growshop owner</b>                    | 5  |
|                                   | <b>Transporting</b>                      | 12 |                                          |    |
|                                   | Financing                                | 8  |                                          |    |
|                                   | Building a plantation                    | 7  |                                          |    |
|                                   | Adding weight to the toppings            | 6  |                                          |    |
|                                   | <b>Growshop owner</b>                    | 5  |                                          |    |
| Supply of cuttings for plants     | <b>Supply of cuttings for plants</b>     | 20 | <b>Supply of cuttings for plants</b>     | 20 |
|                                   | <b>Growshop owner</b>                    | 18 | <b>Growshop owner</b>                    | 18 |
|                                   | Financing                                | 15 |                                          |    |
|                                   | Taking care of plants                    | 15 |                                          |    |
| Taking care of plants             | <b>Coordinator</b>                       | 85 | <b>Coordinator</b>                       | 85 |
|                                   | <b>Taking care of plants</b>             | 52 | <b>Taking care of plants</b>             | 52 |
|                                   | Financing                                | 26 | <b>Protection of plantation</b>          | 18 |
|                                   | Arranging location for plantation        | 24 |                                          |    |
|                                   | <b>Protection of plantation</b>          | 18 |                                          |    |
| Arranging location for plantation | <b>Coordinator</b>                       | 55 | <b>Coordinator</b>                       | 55 |
|                                   | <b>Arranging location for plantation</b> | 24 | <b>Arranging location for plantation</b> | 24 |
|                                   | Taking care of plants                    | 24 | <b>Arraging fake owners of property</b>  | 14 |
|                                   | Building a plantation                    | 15 | <b>Fake owner of a company or house</b>  | 11 |
|                                   | <b>Arraging fake owners of property</b>  | 14 |                                          |    |
|                                   | <b>Fake owner of a company or house</b>  | 11 |                                          |    |
|                                   | Financing                                | 10 |                                          |    |

|                                   |                                          |                    |                                          |                    |
|-----------------------------------|------------------------------------------|--------------------|------------------------------------------|--------------------|
| Diverting electricity             | <b>Coordinator</b>                       | 5                  | <b>Coordinator</b>                       | 5                  |
|                                   | <b>Building a plantation</b>             | 3                  | <b>Building a plantation</b>             | 3                  |
|                                   | <b>Diverting electricity</b>             | 3                  | <b>Diverting electricity</b>             | 3                  |
|                                   | Protection of plantation                 | 3                  | <b>Supply of growth necessities</b>      | 1                  |
|                                   | <b>Arranging location for plantation</b> | 3                  |                                          |                    |
|                                   | Taking care of plants                    | 3                  |                                          |                    |
|                                   | Drying toppings                          | 2                  |                                          |                    |
|                                   | Financing                                | 2                  |                                          |                    |
|                                   | <b>Supply of growth necessities</b>      | 1                  |                                          |                    |
| Arranging storage                 | <b>Coordinator</b>                       | 21                 | <b>Coordinator</b>                       | 21                 |
|                                   | <b>Adding weight to the toppings</b>     | 21                 | <b>Adding weight to the toppings</b>     | 21                 |
|                                   | Taking care of plants                    | 17                 | <b>Drying toppings</b>                   | 16                 |
|                                   | <b>Drying toppings</b>                   | 16                 | <b>Arranging storage</b>                 | 11                 |
|                                   | Financing                                | 16                 | <b>Growshop owner</b>                    | 2                  |
|                                   | <b>Arranging storage</b>                 | 11                 |                                          |                    |
|                                   | Arranging location for plantation        | 6                  |                                          |                    |
|                                   | Arranging fake owners of property        | 5                  |                                          |                    |
|                                   | Building a plantation                    | 3                  |                                          |                    |
|                                   | <b>Growshop owner</b>                    | 2                  |                                          |                    |
| Fake owner of a company or house  | <b>Coordinator</b>                       | 21                 | <b>Coordinator</b>                       | 21                 |
|                                   | <b>Arranging location for plantation</b> | 11                 | <b>Arranging location for plantation</b> | 11                 |
|                                   | Taking care of plants                    | 10                 | <b>Fake owner of a company or house</b>  | 2                  |
|                                   | Building a plantation                    | 6                  | <b>Arranging fake owners of property</b> | 1                  |
|                                   | International trade                      | 3                  |                                          |                    |
|                                   | Transporting                             | 2                  |                                          |                    |
|                                   | Supply of cuttings for plants            | 2                  |                                          |                    |
|                                   | <b>Fake owner of a company or house</b>  | 2                  |                                          |                    |
|                                   | Protection of plantation                 | 2                  |                                          |                    |
|                                   | Cutting toppings                         | 2                  |                                          |                    |
|                                   | Arranging storage                        | 1                  |                                          |                    |
|                                   | <b>Arranging fake owners of property</b> | 1                  |                                          |                    |
|                                   | Protection of plantation                 | <b>Coordinator</b> | 19                                       | <b>Coordinator</b> |
| <b>Taking care of plants</b>      |                                          | 18                 | <b>Taking care of plants</b>             | 18                 |
| Financing                         |                                          | 11                 | <b>Protection of plantation</b>          | 7                  |
| Arranging location for plantation |                                          | 10                 |                                          |                    |
| Arranging fake owners of property |                                          | 8                  |                                          |                    |
| <b>Protection of plantation</b>   |                                          | 7                  |                                          |                    |

|                                     |                                          |    |                                          |    |
|-------------------------------------|------------------------------------------|----|------------------------------------------|----|
| Coordinator                         | <b>Taking care of plants</b>             | 85 | <b>Taking care of plants</b>             | 85 |
|                                     | <b>International trade</b>               | 83 | <b>International trade</b>               | 83 |
|                                     | <b>Financing</b>                         | 63 | <b>Financing</b>                         | 63 |
|                                     | <b>Arranging location for plantation</b> | 55 | <b>Arranging location for plantation</b> | 55 |
|                                     | <b>Coordinator</b>                       | 53 | <b>Coordinator</b>                       | 53 |
|                                     | <b>Selling to coffeeshops</b>            | 43 | <b>Selling to coffeeshops</b>            | 43 |
|                                     | <b>Transporting</b>                      | 34 | <b>Transporting</b>                      | 34 |
|                                     | <b>Adding weight to the toppings</b>     | 31 | <b>Adding weight to the toppings</b>     | 31 |
|                                     | <b>Building a plantation</b>             | 26 | <b>Building a plantation</b>             | 26 |
|                                     | <b>Arranging storage</b>                 | 21 | <b>Arranging storage</b>                 | 21 |
|                                     | <b>Fake owner of a company or house</b>  | 21 | <b>Fake owner of a company or house</b>  | 21 |
|                                     | <b>Cutting toppings</b>                  | 20 | <b>Cutting toppings</b>                  | 20 |
|                                     | <b>Protection of plantation</b>          | 19 | <b>Protection of plantation</b>          | 19 |
|                                     | <b>Drying toppings</b>                   | 14 | <b>Drying toppings</b>                   | 14 |
|                                     | <b>Controlling cutters</b>               | 14 | <b>Controlling cutters</b>               | 14 |
|                                     | <b>Supply of growth necessities</b>      | 13 | <b>Supply of growth necessities</b>      | 13 |
|                                     | <b>Arranging fake owners of property</b> | 11 | <b>Arranging fake owners of property</b> | 11 |
|                                     | Supply of cuttings for plants            | 8  | <b>Diverting electricity</b>             | 5  |
|                                     | <b>Diverting electricity</b>             | 5  |                                          |    |
|                                     | Growshop owner                           | 3  |                                          |    |
| Retail trade within the Netherlands | 2                                        |    |                                          |    |
| Building a plantation               | <b>Coordinator</b>                       | 26 | <b>Coordinator</b>                       | 26 |
|                                     | <b>Financing</b>                         | 15 | <b>Building a plantation</b>             | 9  |
|                                     | Arranging location for plantation        | 15 | <b>Supply of growth necessities</b>      | 3  |
|                                     | Arranging fake owners of property        | 10 | <b>Diverting electricity</b>             | 3  |
|                                     | <b>Building a plantation</b>             | 9  | <b>Growshop owner</b>                    | 1  |
|                                     | Taking care of plants                    | 7  |                                          |    |
|                                     | Selling to coffeeshops                   | 7  |                                          |    |
|                                     | International trade                      | 6  |                                          |    |
|                                     | Fake owner of a company or house         | 6  |                                          |    |
|                                     | Arranging storage                        | 3  |                                          |    |
|                                     | Adding weight to the toppings            | 3  |                                          |    |
|                                     | Supply of cuttings for plants            | 3  |                                          |    |
|                                     | <b>Supply of growth necessities</b>      | 3  |                                          |    |
|                                     | <b>Diverting electricity</b>             | 3  |                                          |    |
|                                     | Protection of plantation                 | 2  |                                          |    |
|                                     | <b>Growshop owner</b>                    | 1  |                                          |    |

### Roles statistics

In Table S-4 statistical analyses for the roles are listed. The calculated characteristics are: amount of actors with particular role, average degree  $\overline{C}_{deg}$  of actors with this role within full network and average VC degree  $\overline{D}_{VC}$  of actor with this role within value chain network. Both degrees are given with 95% confidence interval.

**Table S-4: Statistics for actors with specific roles**

| Role                              | N   | $\overline{C}_{deg}$ |        | $\overline{D}_{VC}$ |       |
|-----------------------------------|-----|----------------------|--------|---------------------|-------|
| Drying toppings                   | 18  | 8.89                 | ±5.06  | 10.94               | ±7.5  |
| Arranging fake owners of property | 8   | 15.38                | ±10.29 | 10                  | ±6.31 |
| Coordinator                       | 104 | 9.26                 | ±2.58  | 9.06                | ±2.46 |
| Adding weight to the toppings     | 31  | 9.19                 | ±4.14  | 8.52                | ±2.17 |
| Cutting toppings                  | 12  | 5.42                 | ±2.17  | 7.83                | ±3.98 |
| Transporting                      | 42  | 9.05                 | ±3.43  | 7.62                | ±4.06 |
| Selling stash to other int. CO    | 80  | 11.01                | ±3.26  | 7.22                | ±2.36 |
| Arranging storage                 | 32  | 6.78                 | ±3.13  | 6.66                | ±2.66 |
| Controlling cutters               | 10  | 5.3                  | ±2.06  | 6.4                 | ±4.75 |
| Financing                         | 49  | 14.84                | ±6.77  | 6.12                | ±2.94 |
| Selling to coffeeshops            | 52  | 7.06                 | ±2.33  | 5.81                | ±2.44 |
| Growshop owner                    | 23  | 5.91                 | ±3.45  | 5.09                | ±2.73 |
| Arranging location for plantation | 67  | 7.58                 | ±2.4   | 4.9                 | ±1.87 |
| Supply of growth necessities      | 22  | 8.14                 | ±4.35  | 4.73                | ±2.9  |
| Supply of cuttings for plants     | 38  | 6.29                 | ±2.85  | 4.55                | ±2.03 |
| Protection of plantation          | 21  | 7.95                 | ±3.33  | 4.14                | ±1.71 |
| Taking care of plants             | 139 | 6.12                 | ±1.72  | 3.08                | ±0.71 |
| Building a plantation             | 48  | 4.15                 | ±1.18  | 3.02                | ±1.16 |
| Fake owner of a company or house  | 27  | 3.63                 | ±1.67  | 2.04                | ±0.8  |
| Diverting electricity             | 15  | 2.87                 | ±1.15  | 1.47                | ±0.88 |
| Disposing waste and leftovers     | 2   | 4                    | ±4.16  | 1                   | ±1.39 |
